# Supplementary material for: Dynamics of Dnmt1 interaction with the replication machinery and its role in postreplicative maintenance of DNA methylation
Source: PubMed Central journal article supplement — Nucleic Acids Res. 2007 Jun 18;35(13):4301–12. doi: 10.1093/nar/gkm432 (PMC1934996; doi:10.1093/nar/gkm432), 2007-06-18
Supplement: nar_gkm432_5.pdf [file nar_gkm432_5.pdf]

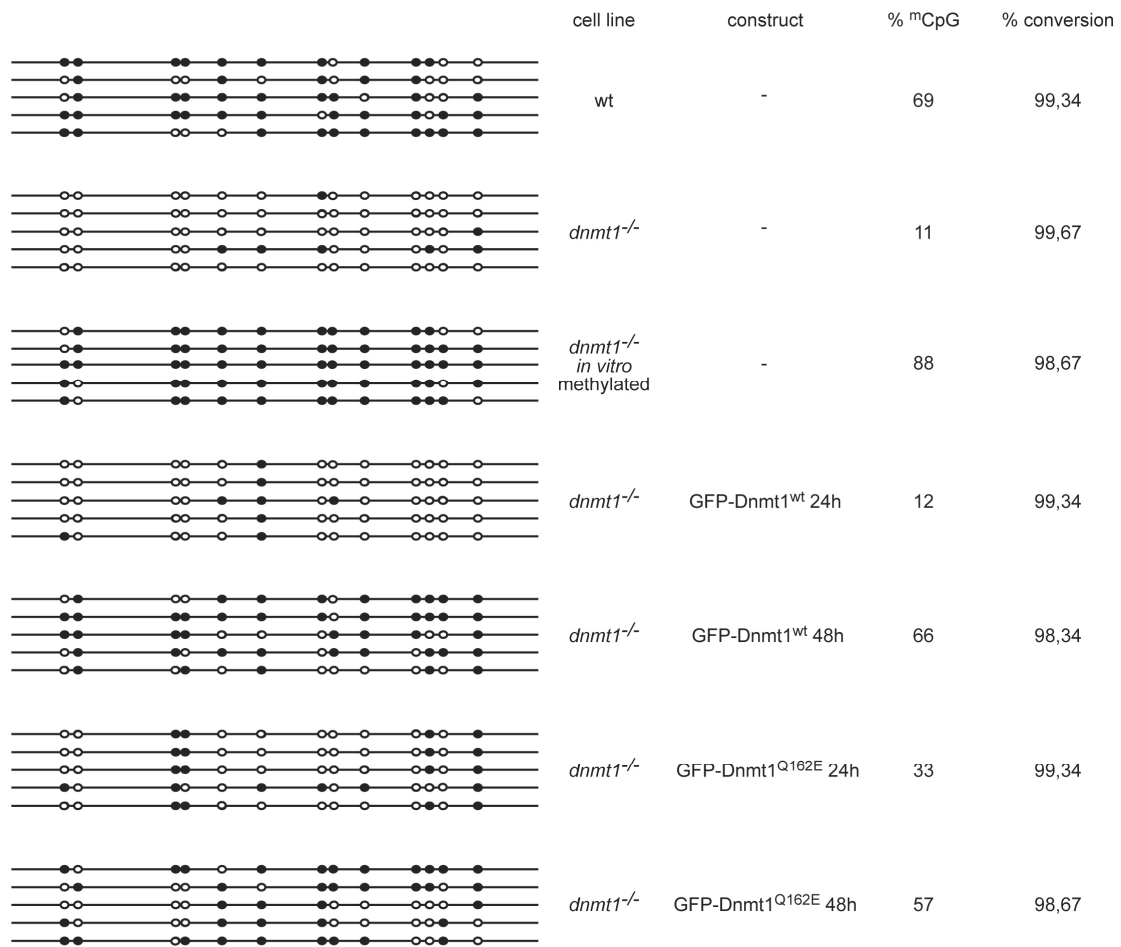

**Supplementary Figure 5.** Bisulfite sequencing of the skeletal  $\alpha$ -actin promoter in wt, Dnmt1 null and Dnmt1 null J1 ES cells transiently transfected with either the GFP-Dnmt1<sup>wt</sup> or GFP-Dnmt1<sup>Q162E</sup> constructs as in Figure 7. Transfected cells were FACS-sorted and genomic DNA isolated 24 and 48 h after transfection as indicated. Genomic DNA from *dnmt1*<sup>-/-</sup> ES cells methylated *in vitro* with recombinant *SssI* methyltransferase was used as a control. PCR products were cloned with the StrataClone PCR Cloning Kit (Stratagene) and individual clones sequenced by automated sequencing at MWG Biotech. Black lines represent sequences from individual clones. Open and closed circles represent unmethylated and methylated cytosines, respectively. Global percentages of converted cytosines and methylation at CpG sites within the analyzed sequence are indicated on the right.
